# Supplementary material
Source: publisher figshare collection journal article supplement (https://acs.figshare.com/ndownloader/files/12361979)
Supplement: Supplementary file 1 [file 12361979]

# **Balancing Crystal Size in Small Molecule Non-Fullerene Solar Cells through Fine-Tuning the Film-Forming Kinetics to Fabricate Interpenetrating Network**

Jiangang Liu<sup>1,\*</sup>, Jie Han<sup>2</sup>, Qiuju Liang<sup>1,3</sup>, Jingming Xin<sup>4</sup>, Yabing Tang<sup>4</sup>, Wei Ma<sup>4,\*</sup>,  
Xinhong Yu<sup>1</sup>, and Yanchun Han<sup>1,\*</sup>

<sup>1</sup> State Key Laboratory of Polymer Physics and Chemistry, Changchun Institute of Applied Chemistry, Chinese Academy of Sciences, Changchun 130022, P. R. China

<sup>2</sup> State Key Laboratory of High Power Semiconductor Lasers, Changchun University of Science and Technology, Changchun 130022, P. R. China

<sup>3</sup> University of the Chinese Academy of Sciences, Beijing 100049, P. R. China

<sup>4</sup> State Key Laboratory for Mechanical Behavior of Materials, Xi'an Jiaotong University, Xi'an 710049, P. R. China

\* To whom correspondence should be addressed

E-mail: [niiitawh@ciac.ac.cn](mailto:niiitawh@ciac.ac.cn) (Liu Jiangang), [msewma@mail.xjtu.edu.cn](mailto:msewma@mail.xjtu.edu.cn) (Ma Wei),  
[yhan@ciac.ac.cn](mailto:yhan@ciac.ac.cn) (Han Yanchun)

\*\*Han Jie and Liang Qiuju contributed equally to this work

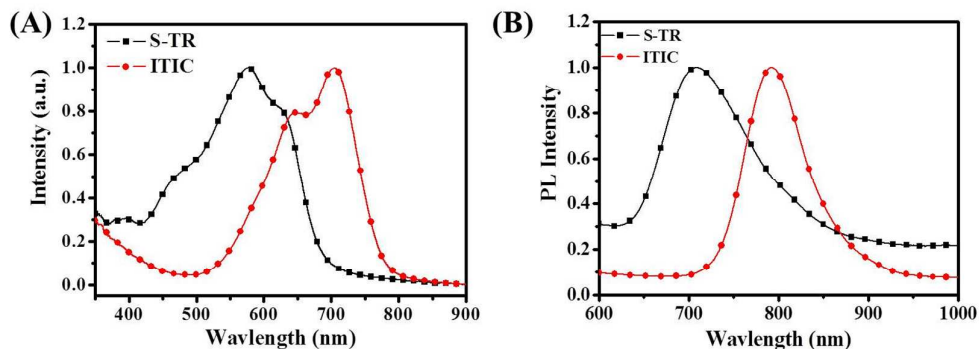

**Figure S1.** (A) UV-vis absorption spectra of S-TR and ITIC film. (B) Photoluminescence spectra of S-TR, ITIC, and S-TR/ITIC blend film.

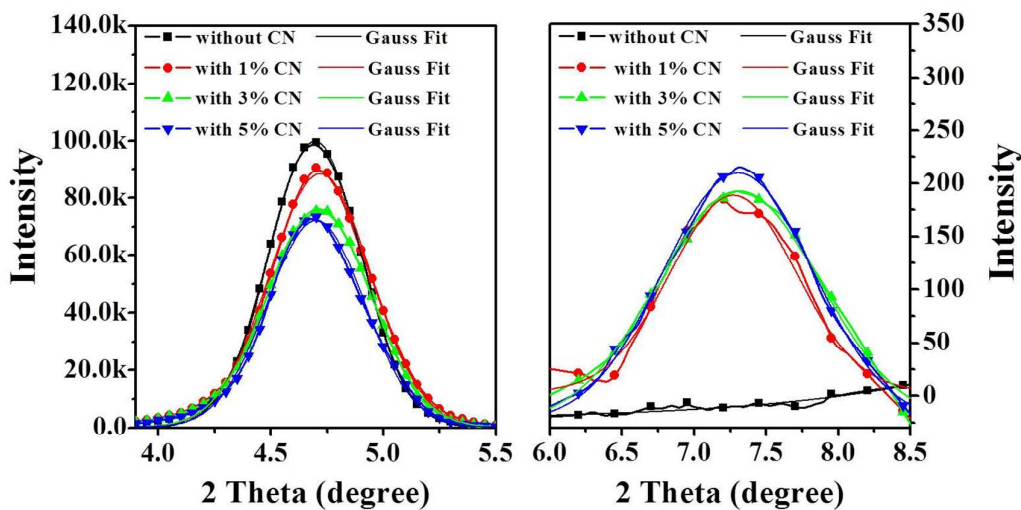

**Figure S2.** GIXD profiles for blend films with different contents of CN. (Left) the diffraction signal of S-TR; (Right) the diffraction signal of ITIC. The coherent length of the donor and acceptor can be estimated using Scherrer's relation.

$$L = \frac{0.9\lambda}{\Delta_{2\theta} \cos \theta}$$

Where  $\Delta_{2\theta}$  is the full width at half maximum of the peak, and it was calculated from Gaussian fitting of the corresponding diffraction peaks.<sup>[1, 2]</sup>

[1] Zhang, S.; Zuo, L.; Chen, J.; Zhang, Z.; Mai, J.; Lau, T.; Lu, X.; Shi M.; Chen, H. *J. Mater. Chem. A*, **2016**, 4, 1702–1707.

[2] Rogers, J.; Schmidt, K.; Toney, M.; Bazan, G.; Kramer, E. *J. Am. Chem. Soc.* **2012**, *134*, 2884–2887.

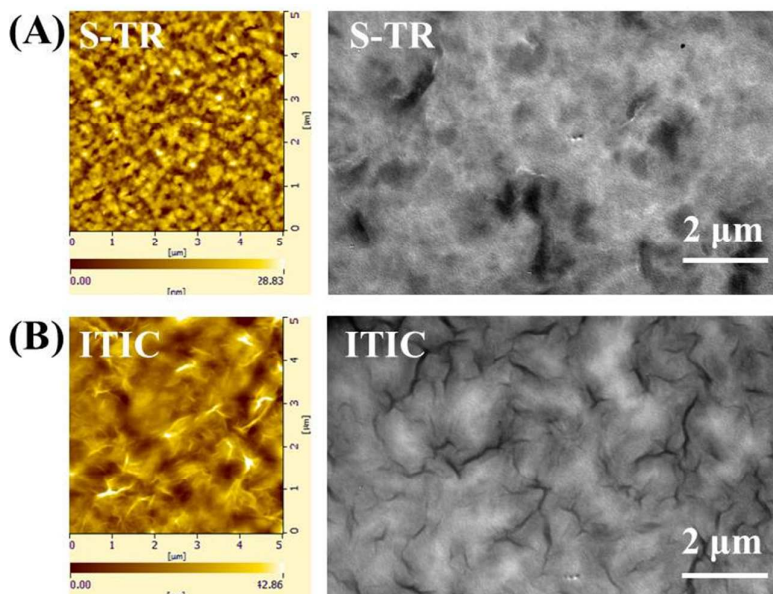

**Figure S3.** Tapping mode AFM height images and TEM images of neat S-TR film (A) and neat ITIC film (B).

The so-called single carrier devices were also fabricated to investigate the effect of CN on carrier transport. **Figure S4** (A) reveals the dark  $J$ - $V$  characteristics of the hole-only devices, having a structure of ITO/PEDOT:PSS/S-TR:ITIC/MoO<sub>3</sub>/Al with the S-TR:ITIC films without and with different contents of CN, respectively. In addition, the electron-only devices involving a structure of Al/S-TR:ITIC/Ca/Al were also fabricated and the dark  $J$ - $V$  characteristics are shown in Figure S5(B)

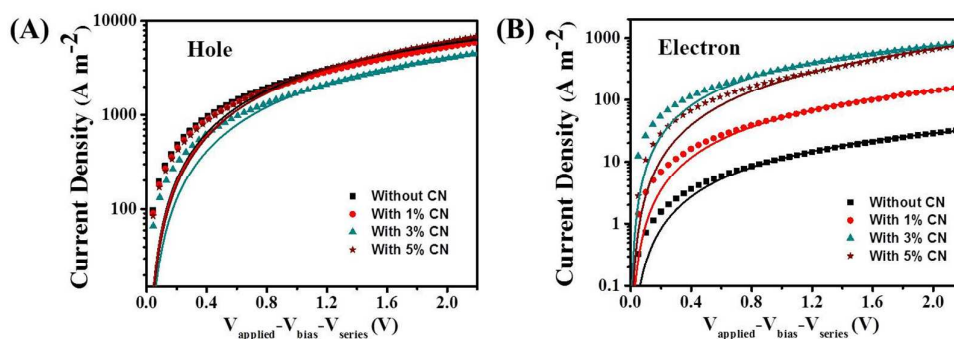

**Figure S4.**  $J$ - $V$  curves of hole-only devices (A) and electron-only devices (B) based on the S-TR:ITIC films without and with different contents of CN.

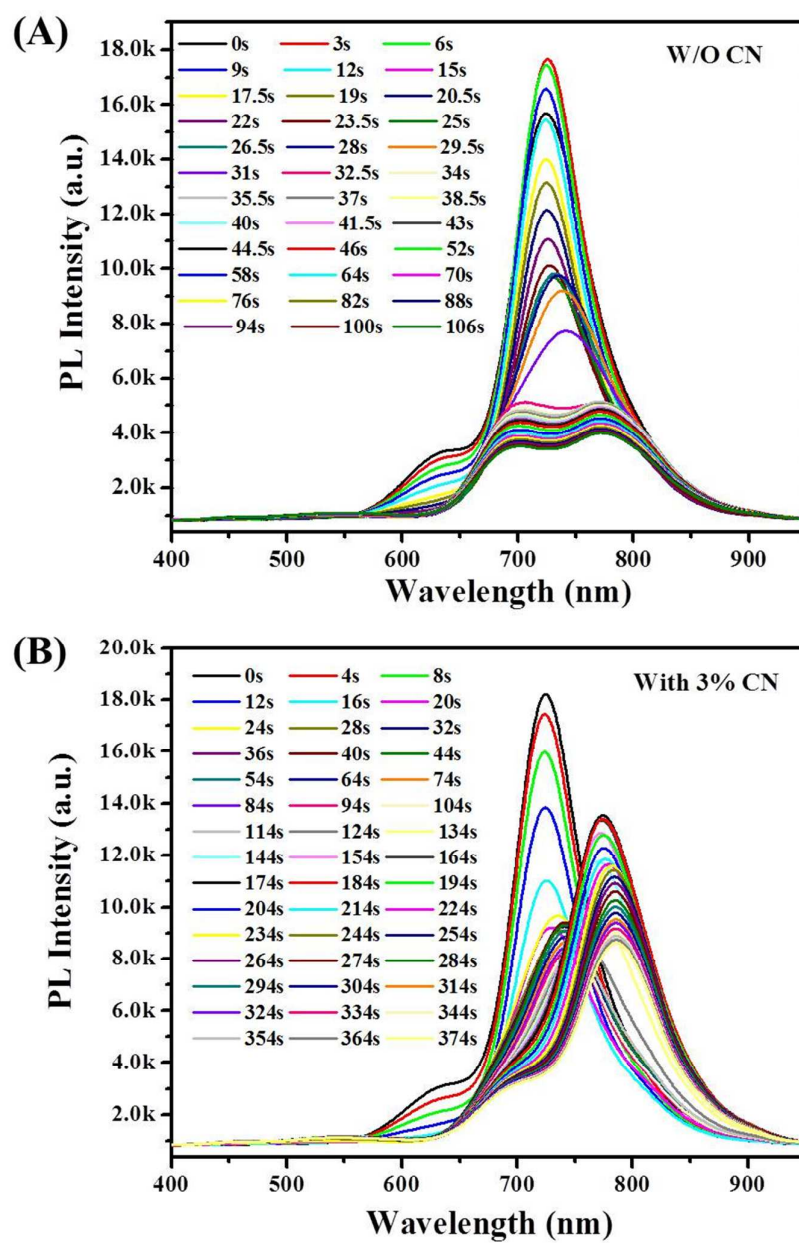

**Figure S5.** In-situ PL spectra of S-TR/ITIC blend films processed without CN (A) and with 3% CN (B).

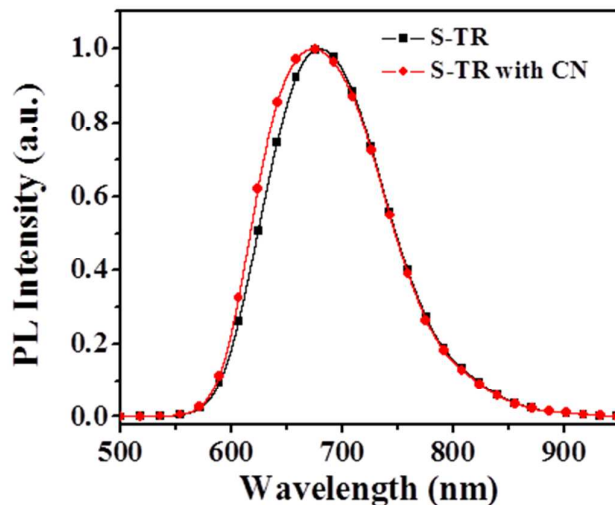

**Figure S6.** PL spectrum of S-TR solution without and with 3% CN.

As shown in Figure S7, the measurements of  $V_{oc}$  as a function of light intensity were recorded. As well known, when bimolecular recombination is dominant, the slope of the  $V_{oc}$  versus light intensity should be equal to  $kT/q$  (where  $q$  represents the elementary charge and  $k$  represents the Boltzmann constant). When the slope would be greater than  $kT/q$ , it implied the extra interfacial trap-assisted Shockley–Read–Hall recombination is dominant.

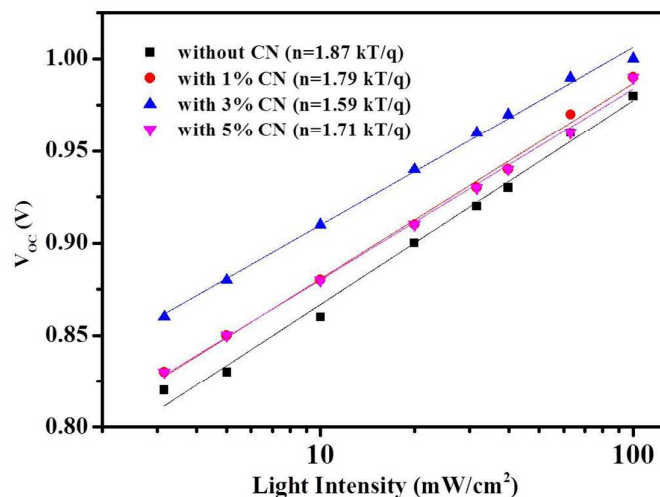

**Figure S7.**  $V_{oc}$  of devices processed without and with CN as a function of light intensity.

|           | <b>b.p. (°C)</b> | <b>v.p. (kPa)</b> | <b>ITIC (mg/ml)</b> | <b>S-TR (mg/ml)</b> |
|-----------|------------------|-------------------|---------------------|---------------------|
| <b>CB</b> | 131.7            | 1.17              | > 60                | < 8                 |
| <b>CN</b> | 260.0            | 7.13 E-9          | > 100               | > 18                |

**Table S1.** The relative parameters of solvent, additive, donor and acceptor.
